# Supplementary material
Source: PubMed Central journal article supplement (PMC7240098)
Supplement: IAI.00100-20-s0001.pdf [file IAI.00100-20-s0001.pdf]

Table S1. Strains and plasmids used

| Name                           | Characteristics                                                                      | Source         |
|--------------------------------|--------------------------------------------------------------------------------------|----------------|
| <b>Strains</b>                 |                                                                                      |                |
| <b>EAEC 042</b>                | Enteroaggregative E. coli strain 042                                                 | 1              |
| <b>042ΔaarΔaggR</b>            | 042 derivative carrying aar and aggR deletions                                       | This study     |
| <b>042ΔaarΔaggRΔhns</b>        | 042 derivative carrying aar, aggR and hns deletions                                  | This study     |
| <b>042ΔaarΔaggR hns repair</b> | 042 derivative carrying aar and aggR deletions with repaired hns                     | This study     |
| <b>042ΔaafA</b>                | 042 derivative carrying aafA deletion                                                | 2              |
| <b>E. coli DH5α</b>            | K12 strain                                                                           | Lab collection |
| <b>DH5αΔhns</b>                | DH5α derivative carrying hns deletion                                                | This Study     |
| <b>Plasmids</b>                |                                                                                      |                |
| <b>pBR322</b>                  | Cloning and expression vector (Amp <sup>R</sup> , Tet <sup>R</sup> )                 | Lab collection |
| <b>pACYC177</b>                | Cloning and expression vector (Amp <sup>R</sup> , Km <sup>R</sup> )                  | Lab collection |
| <b>pKNT25</b>                  | BACTH vector for fusions to the C-terminus of fragment T25                           | Lab collection |
| <b>pPrham-aar</b>              | pBR322 derivative encoding Aar under the rhamnose promoter                           | This study     |
| <b>pPlacZ-aggR</b>             | pACYC177 derivative encoding AggR under the lacZ promoter                            | This study     |
| <b>pPlacZ-aggR-D</b>           | pACYC177 derivative encoding AggR dimerization domain 69-181 under the lacZ promoter | This study     |
| <b>pKNTHNS</b>                 | Plasmid encoding orf 1292 fused to the T25 fragment of CyaA                          | 3              |

1. Nataro JP, Yikang D, Cookson S, Cravioto A, Savarino SJ, Guers LD, Levine MM, Tacket CO. 1995. Heterogeneity of Enteroaggregative “Escherichia coli” virulence demonstrated in volunteers. *J Infect Dis* 171:465–468.
2. Izquierdo M, Alvestegui A, Nataro JP, Ruiz-Perez F, Farfan MJ. 2014. Participation of integrin α5β1 in the fibronectin-mediated adherence of enteroaggregative Escherichia coli to intestinal cells. *Biomed Res Int* 2014:781246.
3. Santiago AE, Yan MB, Hazen TH, Sauder B, Meza-Segura M, Rasko DA, Kendall MM, Ruiz-Perez F, Nataro JP. 2017. The AraC Negative Regulator family modulates the activity of histone-like proteins in pathogenic bacteria. *PLoS Pathog* 13:e1006545.

Table S2. primers

| Name                                                                                                     | DNA sequences (5->3)                                                                                                                                                                                                      |
|----------------------------------------------------------------------------------------------------------|---------------------------------------------------------------------------------------------------------------------------------------------------------------------------------------------------------------------------|
| <b>Primers employed for deletion of aggR (Region 41,080-41,877; GenBank FN554767.1)</b>                  |                                                                                                                                                                                                                           |
| <b>LRaggRFd</b>                                                                                          | TTTTGCCGTTACGCACCACTCCGTCAGTAGCTGAACAGGAG<br>GGACAGCTGATAGAAACAGAAGCCACTGGAGCACCTCAAAA<br>ACACCATCATACTAAATCAGTAAGTTGGCAGCATCACCAA<br>CTTCAGCCATCTCAATATGTTTATAGCAATCTCAAATAATGATA<br>TGAAACATGTTTGTGTAGGCTGGAGCTGCTTC    |
| <b>LRaggRrev</b>                                                                                         | AAGAATACGATAAATAATTTCCATTGTAATTATAAGCGTAAAAA<br>TCATATCCCACATGACGATGTGGAAATTAACAAACGTATTTTAT<br>ATGAGTTAAAAATATATCTTTTTATTGATAAGAGTTAGGTCATT<br>CTAACGCAGATTGCCTGATAAAGACATTTTTTTCATGTGAGAA<br>TGATATGGGAATTAGCCATGGTCC   |
| <b>Primers employed for deletion of hns (Region 1,376,831-1,377,244; GenBank FN554767.1)</b>             |                                                                                                                                                                                                                           |
| <b>hns lambda forward</b>                                                                                | CGGCGCAAATAGGGCTATATGCCGCGTCTTTTCTGGCTAATT<br>TTATGAAAAGATATTTATTGGCGGCACAAAATAAAGAACAATTT<br>TGAATTCCTTACATTCCTGGCTATTGCACAACCTGAATTTAAGG<br>CTCTATTATTACCTCAACAAACCACCCCAATATAAGTTTGAGAT<br>TACTACAGTGTAGGCTGGAGCTGCTTC |
| <b>hns lambda reverse</b>                                                                                | AAGTAACATCCGTATCGGTGTTATCCACGAAACGGCGTTGAG<br>TAATCGACGCCGTTTTTTTATAGCTTATTCTTATTAATTGTCTT<br>AAACCGGACAATAAAAAATCCCGCCGATGGCGGGATTTTTAA<br>GCAAGTGCAATCTACAAAAGATTATTGCTTGATCAGGAAATCG<br>TCGAGGGAATGGGAATTAGCCATGGTCC   |
| <b>Primers employed for screening of 042ΔaarΔaggR and 042ΔaarΔaggRΔhns and DH5αΔhns</b>                  |                                                                                                                                                                                                                           |
| <b>AggRFDLR</b>                                                                                          | TTCAGCCATCTCAATATGTTTATAGCA                                                                                                                                                                                               |
| <b>AggRrevLR</b>                                                                                         | TGGACTGTTGCGATCGTGAAGCC                                                                                                                                                                                                   |
| <b>AggRFdLR1</b>                                                                                         | TACCGGGTTGAGAAGCGGTGTAA                                                                                                                                                                                                   |
| <b>KanrevLR1</b>                                                                                         | TTGTCCAGATAGCCCAGTAGCTG                                                                                                                                                                                                   |
| <b>Hns sense</b>                                                                                         | ATGAGCGAAGCACTTAAAATTCTGAACAACATCCGTA CTCTT<br>CGTGCGC                                                                                                                                                                    |
| <b>Hns rev</b>                                                                                           | TTATTGCTTGATCAGGAAATCGTTCGAGGGATTACC                                                                                                                                                                                      |
| <b>H-NS (upstream) sense</b>                                                                             | ATCCTTCTGAGCTATCATTACA ACTGCC                                                                                                                                                                                             |
| <b>Primers employed for recombining hns in 042ΔaarΔaggRΔhns and screening of 042ΔaarΔaggR hns repair</b> |                                                                                                                                                                                                                           |
| <b>HnsFd</b>                                                                                             | CCCTTACGAAGCCTTGCATAATCCTTCTGAG                                                                                                                                                                                           |
| <b>HnsRv</b>                                                                                             | GGTGAAAGCGTACCGATGGTTGGC                                                                                                                                                                                                  |

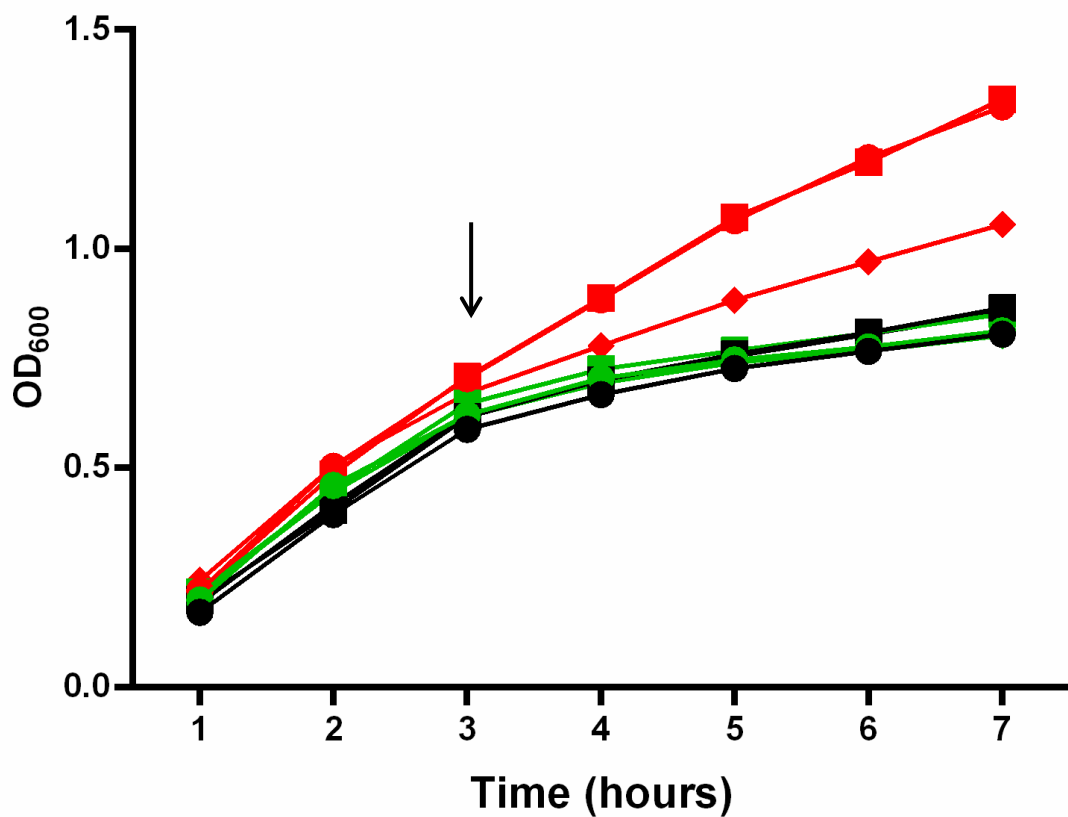

Figure S1. Growth curves in presence and absence of inducer molecules. Growth curves were measured for WT 042 (circles), 042Δ*aar*Δ*aggR* (squares), and 042Δ*aar*Δ*aggR*(*paar*)(*paggR*) (diamonds) in LB (black), LB+1mM IPTG (green), or LB+1% rhamnose (red). Growth curve data are representative of at least three independent experiments.

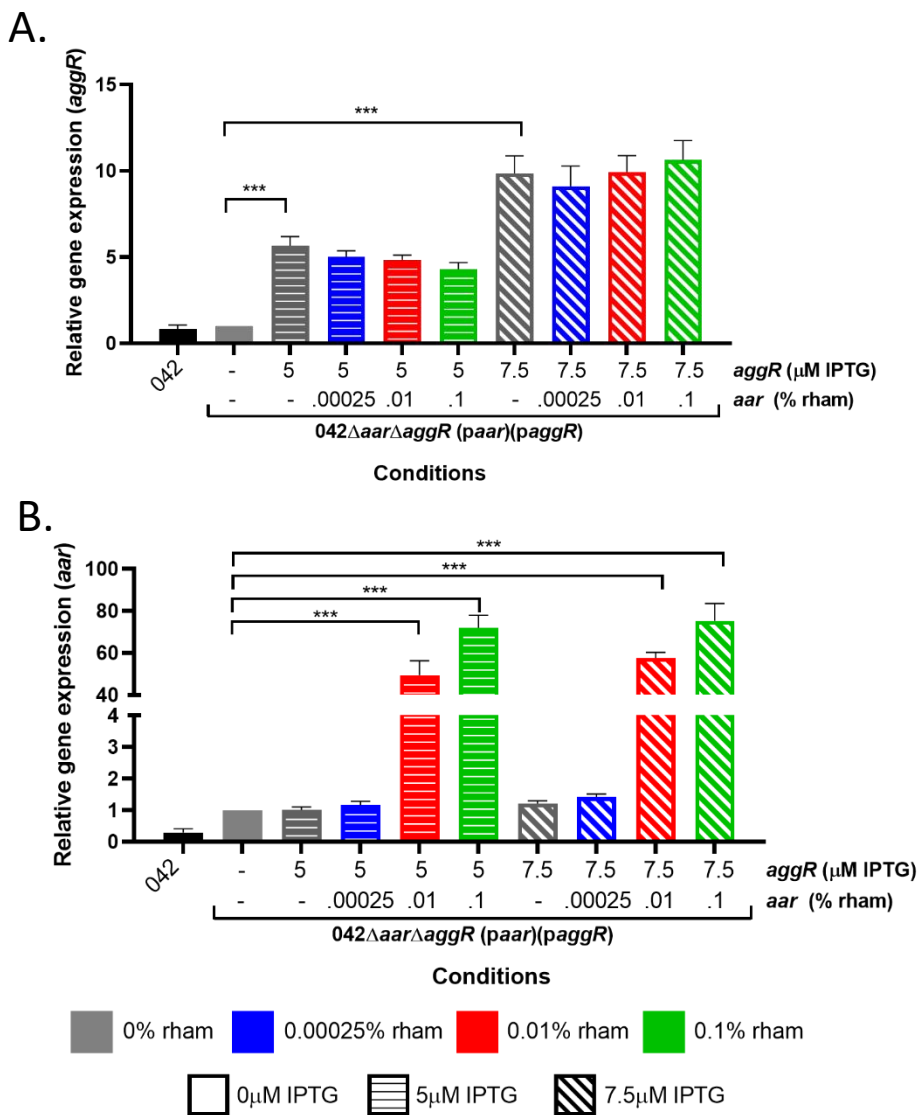

Figure S2. Titration expression of *aar* and *aggR* in  $042\Delta aar\Delta aggR$ . (A) qRT-PCR analysis of *aggR* and (B) *aar* using titratable *aar* and *aggR*. *aggR* expression was induced with either 5 μM IPTG (horizontal fill pattern) or 7.5 μM IPTG (diagonal fill pattern). *aar* expression was induced with 0.00025% rham (blue), 0.01% rham (red), or 0.1% rham (green). Biofilm data and qRT-PCR data are representative of at least three independent experiments. Asterisks indicate significant differences by ANOVA (\*,  $P < 0.05$ ; \*\*,  $P < 0.005$ ; \*\*\*,  $P < 0.0005$ ).

A.

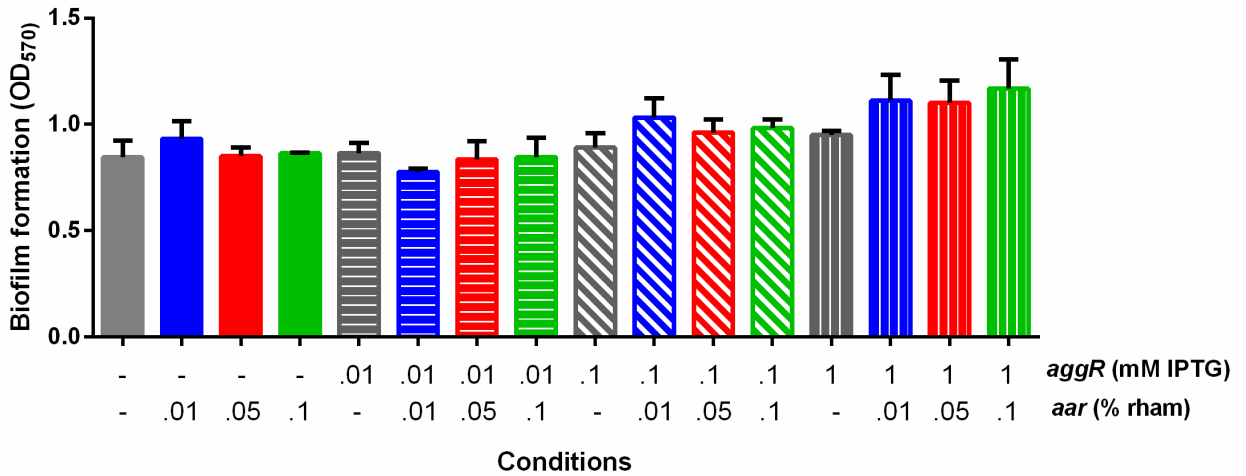

B.

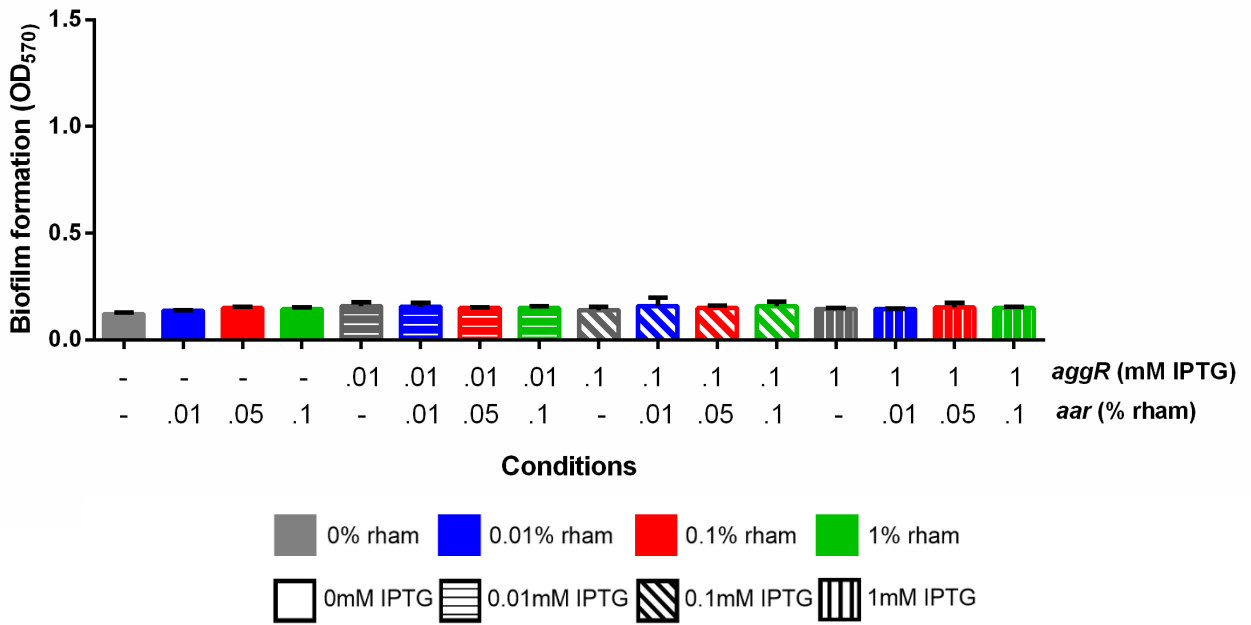

Figure S3. Inducer effects in titration constructs. (A) Biofilm growth of 042Δ*aar*Δ*aggR*(*paggR*) at 3 hours post induction with increasing concentration of IPTG and rhamnose. (B) Biofilm growth of 042Δ*aar*Δ*aggR*(*paar*) at 3 hours post induction with increasing concentration of IPTG and rhamnose. *aggR* expression was induced with 0.01mM IPTG (horizontal fill pattern), 0.1mM IPTG (diagonal fill pattern), or 1mM IPTG (vertical fill pattern). *aar* expression was induced with 0.01% rham (blue), 0.05% rham (red), or 0.1% rham (green). Biofilm data are representative of at least three independent experiments.

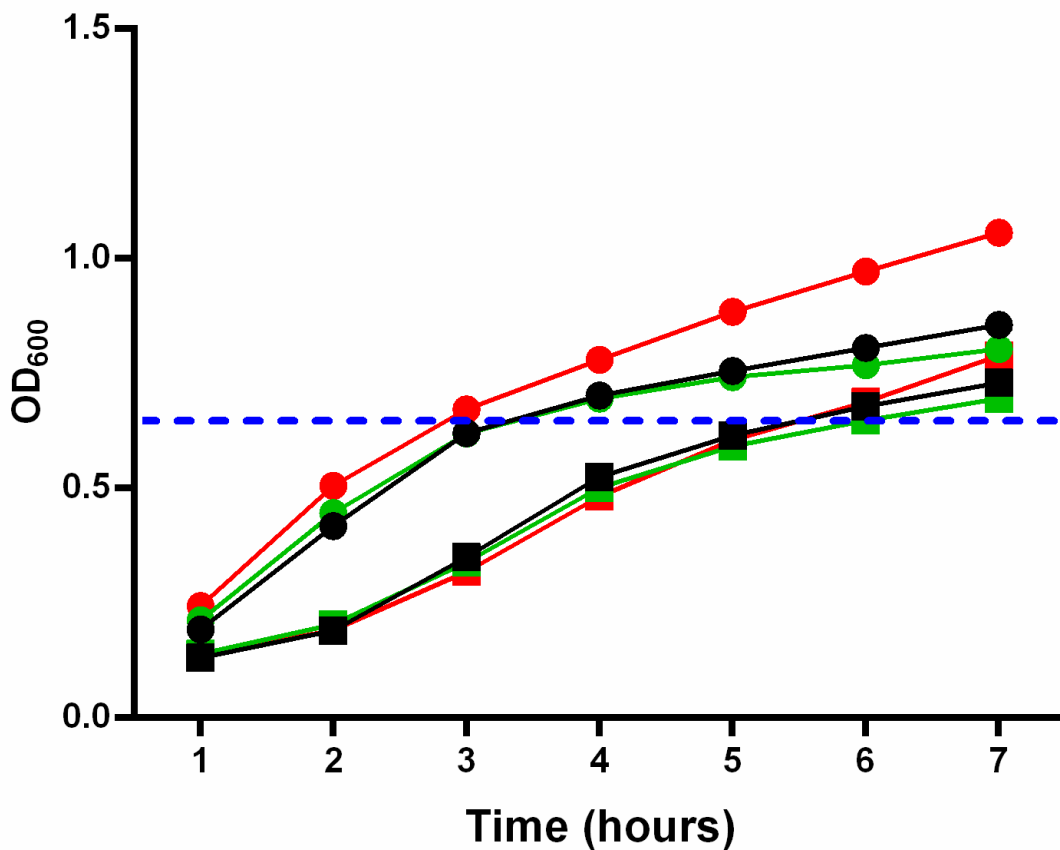

Figure S4. Growth curve of 042ΔaarΔaggR and 042ΔaarΔaggRΔhns in different conditions.

Growth curves were measured for 042ΔaarΔaggR(paar)(paggR) (circles) and

042ΔaarΔaggRΔhns(paar)(paggR) (squares) in LB (black), LB+1mM IPTG (green), or

LB+1% rhamnose (red). Growth curve data are representative of at least three independent

experiments.

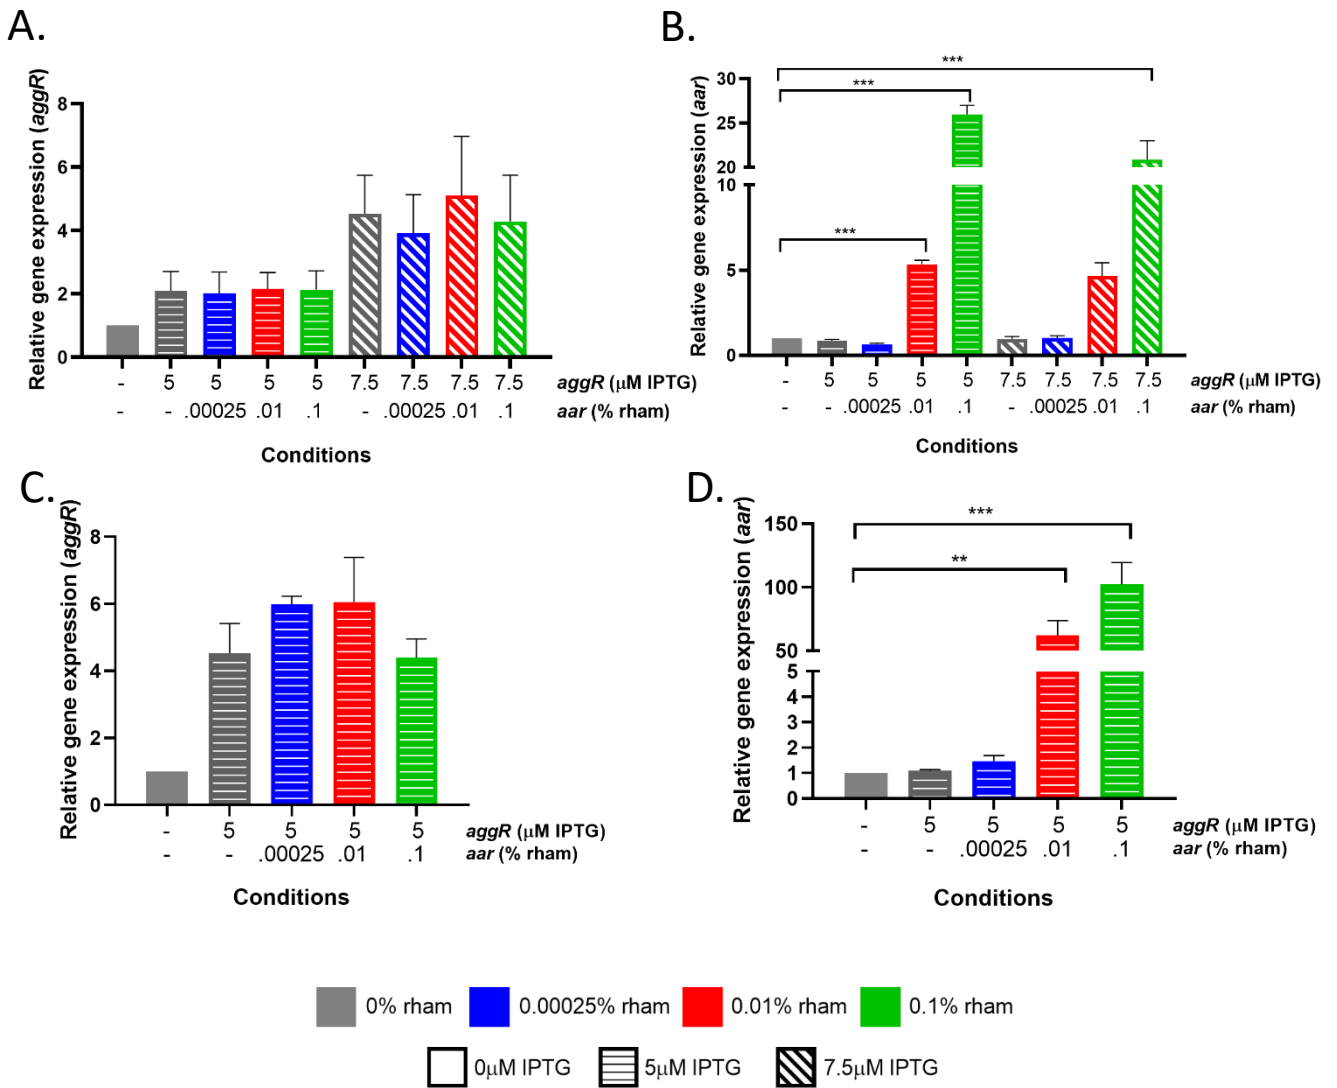

Figure S5. Titration expression of *aar* and *aggR* in *042ΔaarΔaggRΔhns* and *hns* repair. (A) qRT-PCR analysis of *aggR* and (B) *aar* using titratable *aar* and *aggR* in *042ΔaarΔaggRΔhns* after 5h. (C) qRT-PCR analysis of *aggR* and (D) *aar* using titratable *aar* and *aggR* in the *hns* repaired *042ΔaarΔaggR* after 3h. *aggR* expression was induced with either 5 μM IPTG (horizontal fill pattern) or 7.5 μM IPTG (diagonal fill pattern). *aar* expression was induced with 0.00025% rham (blue), 0.01% rham (red), or 0.1% rham (green). qRT-PCR data are representative of at least three independent experiments. Asterisks indicate significant differences by ANOVA (\*,  $P < 0.05$ ; \*\*,  $P < 0.005$ ; \*\*\*,  $P < 0.0005$ ).

A.

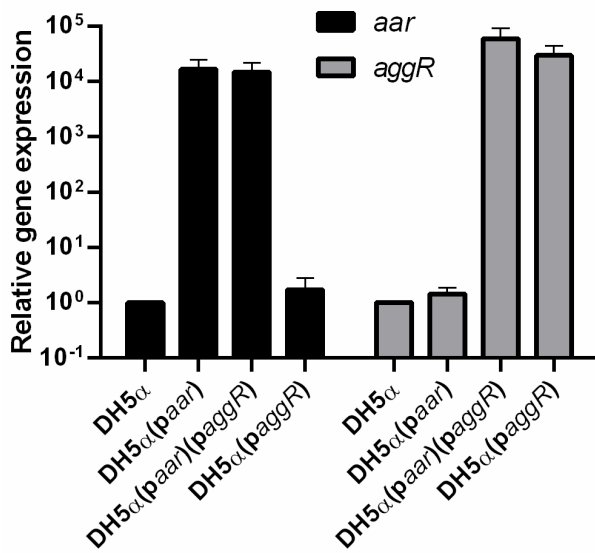

B.

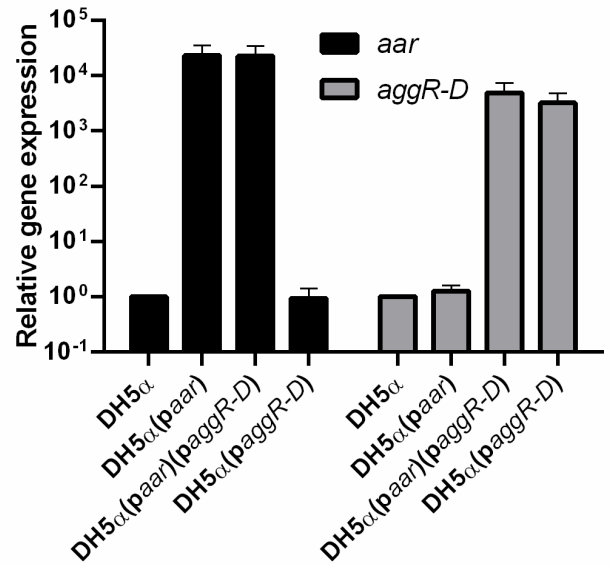

Figure S6. Expression levels of *aar*, *aggR*, and *aggR-D* in DH5 $\alpha$  transformed with *paar* and/or *paggR/paggR-D*. (A) DH5 $\alpha$  was transformed with *paar* and *paggR* expressing full length *aggR* or their corresponding empty vectors pBR322 and pACYC177, respectively. Transcriptional levels of *aar* and *aggR* were analyzed by qRT-PCR. (B) DH5 $\alpha$  was transformed with *paar* and *paggR-D* expressing the AggR dimerization domain or their corresponding empty vectors. Transcriptional levels of *aar* and *aggR-D* were analyzed by qRT-PCR. RT-PCR data are representative of at least three independent experiments .



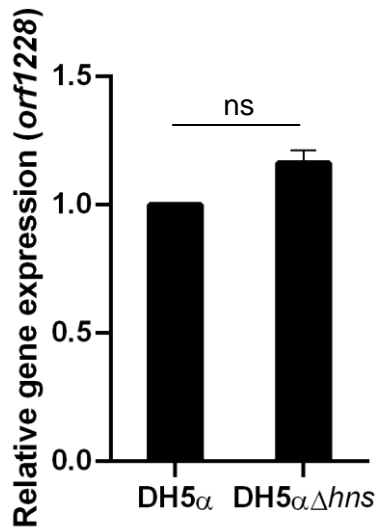

Figure S7. Expression of *orf1228* in DH5 $\alpha$  and DH5 $\alpha\Delta hns$ . Transcriptional levels of *orf1228* in DH5 $\alpha$  and DH5 $\alpha\Delta hns$  were analyzed by qRT-PCR. RT-PCR data are representative of at least three independent experiments .
